# Supplementary material for: Oxidation kinetics of nitrogen doped TiO2−δ thin films
Source: Royal Society of Chemistry journal article supplement (doi:10.1039/c2cp42559a), 2012-01-01
Supplement: c2cp42559a.pdf [file c2cp42559a.pdf]

### Electronic supplementary information (ESI)

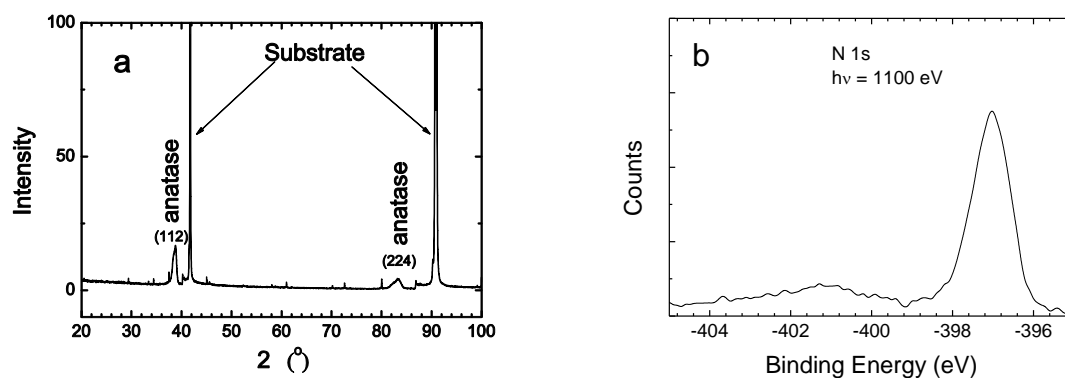

Fig. 1 (a) XRD pattern of the N-doped  $\text{TiO}_{2-\delta}$  thin film prepared under  $\text{N}_2$  pressure of 2 Pa, (b) N 1s peak in the XPS spectrum of the N-doped  $\text{TiO}_{2-\delta}$  thin film prepared in 4 Pa  $\text{N}_2$ .

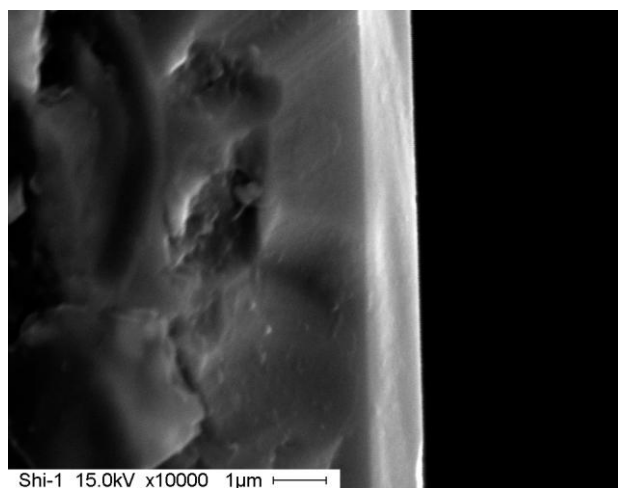

Fig. 2 SEM micrograph of the cross-section of the N-doped  $\text{TiO}_{2-\delta}$  thin film showing the thickness of the film of about 1  $\mu\text{m}$ .

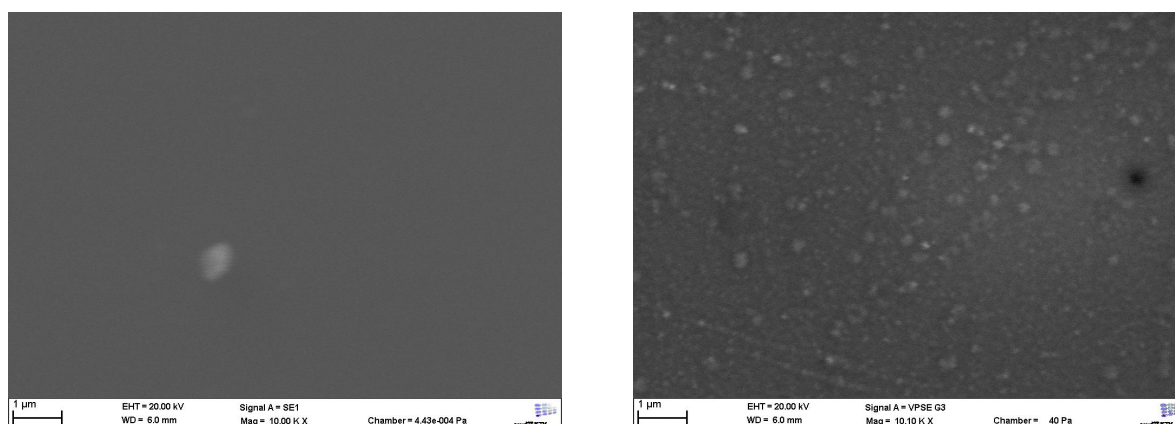

Fig. 3 SEM micrograph of the surface N-doped  $\text{TiO}_{2-\delta}$  thin film (a) before and (b) after oxidation in  $\text{O}_2$ .

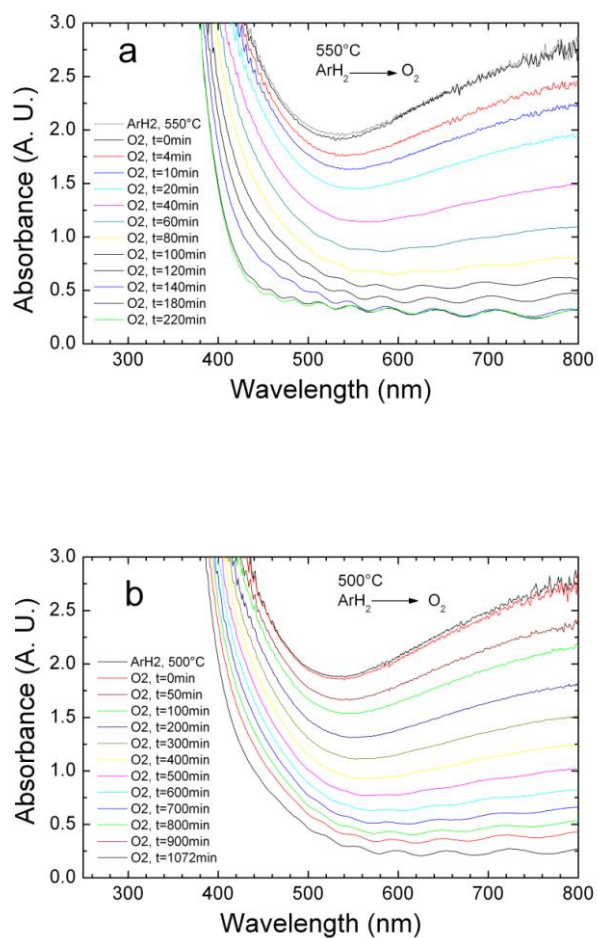

Fig. 4 Time-dependent electronic absorption spectra at (a) 550 °C and (b) 500 °C of the N-doped  $\text{TiO}_{2-x}$  thin film, prepared under nitrogen partial pressure of 2 Pa, upon the rapid change of surrounding atmosphere from Ar + 5%  $\text{H}_2$  to  $\text{O}_2$ .
